# Supplementary material for: Deubiquitinating enzyme USP10 promotes hepatocellular carcinoma metastasis through deubiquitinating and stabilizing Smad4 protein
Source: PubMed Central journal article supplement (PMC6944132; doi:10.1002/1878-0261.12596), 2019-11-27
Supplement: MOL2-14-197-s006.pdf [file MOL2-14-197-s006.pdf]

## Supplementary Figure and Supplementary Figure Legends

### Supplementary Figure S1. Positive correlation between Smad4 protein levels and HCC progression

(A) The survival rate significantly decreases in HCC patients with high levels of Smad4 and TGF- $\beta$  compared to those with low expression levels (TCGA database). (B) The mRNA levels of Smad4 closely correlate with the high risk of HCC patients (TCGA database). (C) The mRNA levels of *SERPINE1/ JUNB/ CDKN2B* (three well-known TGF- $\beta$  signaling target genes) significant associated with high risk of HCC patients (TCGA database). \*\*\*,  $P < 0.001$ .

### Supplementary Figure S2. Positive correlation between USP10 protein and HCC progression

(A) The mRNA levels of USP10 closely correlate with the high risk of HCC patients (TCGA database). (B) The Progression-Free Survival (PFS) rate significantly decreases in hepatitis virus-related HCC patients with high levels of USP10 compared to those with low expression levels (Kaplan-Meier Plotter). (C) A positive correlation of gene expression correlation analysis between *USP10* and *CDKN2B* (GEPIA database). \*\*\*,  $P < 0.001$ .

### Supplementary Figure S3. USP10 regulates Smad4 protein levels through the ubiquitin-proteasome system

(A) The semi-quantitative analyses using density measurements on the protein levels of Smad4 in Fig. 2A. (B) The effect of USP10 silencing on Smad4 can be restored by the proteasome inhibitor MG132. (C&D) The semi-quantitative analyses using density measurements on the protein levels of Smad4 in Fig. 2C (C) and Fig. 2E (D). (E) Spautin-1 imposed minimal effect on Smad4 protein levels in USP10-depleted cells. (F) Overexpression of USP10-WT/C424A had little effect on Smad4 mRNA levels. (G) Depletion of USP10 imposed little effect on the half-life of Smad2/3 protein. The results represent the means ( $\pm$ SD) of three independent experiments. n.s,  $P > 0.05$ , \*\*,  $P < 0.01$ , \*\*\*,  $P < 0.001$ .

### Supplementary Figure S4. The types of poly-ubiquitination occurring on Smad4

(A&B) The semi-quantitative analyses using density measurements on the protein levels of smears of ubiquitin in Fig. 4A (A) and Fig. 4B (B). (C) The types of poly-ubiquitination occurring on Smad4. (D-F) The semi-quantitative analyses using density measurements on the protein levels of smears of ubiquitin in Fig. 4C (D), Fig. 4D (E) and Fig. 4E (F).

**Supplementary Figure S5. Depletion of USP10 or depriving of its catalytic activity with small molecule inhibitor Spautin-1 imposed minimal effect on the cell proliferation**

(A) Depletion of USP10 imposed minimal effect on the cell proliferation. (B) Western-blot to test the protein levels of Smad4 in Fig 5D and 5E. (C) Spautin-1 imposed minimal effect on the cell proliferation. (D) Highly correlation between USP10 and smad4 expression in tumor tissues. Western blot analysis of paired samples of non-tumorous tissues (N) and tumor (T) from the same DEN-induced HCC mice.

**Supplementary Table S1. Complete list of the siRNAs targeting 54 human known or predicted ubiquitin-specific proteases (USPs)**

| Gene name | Sense siRNA Sequence (5'-3') |
|-----------|------------------------------|
| USP1      | GCAUAGAGAUGGACAGUAU          |
|           | GAAAUACACAGCCAAGUAA          |
|           | CAUAGUGGCAUUACAAUUA          |
|           | GCACAAAGCCAACUAACGA          |
| USP2      | CCAGCAAGCUCACAACAUAU         |
|           | UCGCUGACGUGUACAGAUU          |
|           | GCCGACAGAUGUGGAGAAA          |
|           | GGUUACUGUUCUACGGUCU          |
| USP3      | GAAGUAAGCGCUCUAAGAA          |
|           | GUAGAAGAGUUUAGAAAGA          |
|           | GCACACAGUAUGUAUGGAU          |
|           | CCUCAUAUGUGGGACAGAA          |
| USP4      | CCAAUUGGAUGAAGGUUUA          |
|           | GGAAUAAACUACUAAACUG          |
|           | GAUCUGAACCGGGUAAAGA          |
|           | GAAUUGGACUAUGUAUUGG          |
| USP5      | GAGCUGACGUGUACUCAUA          |
|           | GGACAACCCUGCUCGAAUC          |
|           | GGAGAGACAUUUCAUAAG           |
|           | GAUCUACAAUGACCAGAAA          |
| USP6      | CAACGGACCUGGAUUAUAGG         |
|           | GCGGAGAGGUUCACAACAA          |
|           | GAGCGGAAGGACAUACUUA          |
|           | GAACCUGAUUGACGGGAUC          |
| USP7      | CUAAGGACCCUGCAAUUA           |

GUGGUUACGUUAUCAAUA  
UGACGUGUCUCUUGAUAAA  
GAAGGUACUUUAAGAGAUC

---

USP8

UGAAAUACGUGACUGUUUA  
GGACAGGACAGUAUAGAU  
AAUAAAAGCUCAACGAGAA  
GGCAAGCCAUUUAAGAUUA

---

USP9X

CAAAGGAGAUUUACUAGAA  
AGAAAUCGCUGGUUAAAAU  
ACACGAUGCUUUAGAAUUU  
GUACGACGAUGUAUUCUCA

---

USP9Y

GGAAUGAAAUGCUUUGAAA  
GUACGGCGAUGUAUUGUUA  
GAAUGUACCUGCUACCUUU  
GCAGUUGUCCUGUUGCUUA

---

USP10

CCAUAAAGAUUGCAGAGUU  
CAAACAAGAGGUUGAGAU  
CCACAUUAUUUACAGACU  
GAGUUGCACACCACGGAAA

---

USP11

GGGCAAUUCUCACACUGUU  
GAACAAGGUUGGCAUUUU  
GAUGAUUCUUCGUCUAUG  
GAGAAGCACUGGUUAAGC

---

USP12

CAUCAGUAUCUCAAGAA  
CCAGAUGUCUUACUUGUGA  
GAAACUCUGUGCAGUGAAU  
GAAGAAUUCUACGGGUUGA

---

USP13

GAAGAUGGGUGAUUUACAA

GCACUGGAUUGGAUCUUUA  
GCACGAAACUGAAGCCAAU  
UGAUUGAGAUGGAGAAUAA

---

USP14

GCAUAUCGCUUACGUUCUA  
GGACUUAAAUUGCGACUUC  
CAAGAUGAAUGGAUUAAGU  
GGAGUUACCAUGUGGAUUG

---

USP15

GAAGAAGGCUCACCAAGUG  
GAACGCACCUUGGAAGUUU  
GCAGAUAAAGAUGAUAGUUA  
CAGAUAAAGGUGGUUGCCGA

---

USP16

CGAAUAAACUGCUUUGUGA  
GGAACAAGGUAAUUUGAAA  
GAACACAGUGGUACUAUGA  
CAAUAGUCAUCUCUCUAA

---

USP17L2

GGAAAUACCUAGCUACGAGA  
GCAGGUAGAUCAUCACUCU  
CCAAGAAUGUGCAAUAUCC  
CGGGAGCACUCUCAACAUCU

---

USP17L9P

UGUCACAGGCAACAAGAUU  
GGGCUCUGCUUGUGUGCCA  
UCAAAAUACAAGUGUGGGA  
GCAGGUAGAUCAUCACUCU

---

USP18

GGAAGAAGACAGCAACAUG  
CGUUUGGGCUCCUGAGGCA  
UGAUUCAGGUGUUCGUAAU  
GAGCAGAGGAGAAGCGUCC

---

USP19

GAUGAGGAAUGACUCUUUC

|        |                                                                                          |
|--------|------------------------------------------------------------------------------------------|
|        | GAGGACACCACUAGUAAGA<br>UGGCGGAGGUAAUUAAGAA<br>UCAAGAAUGACUCGUAUGA                        |
| USP20  | GCGAGUGGCUCAACAAGUU<br>CAAGAAAGCCCAGGUUUUG<br>UCUGAAAGCUGUCCUAUU<br>GAACGCCGAGGGCUACGUA  |
| USP21  | GUACAAAGAUUCCUCGAA<br>GAACCUGAGUUAAGUGAUG<br>GAGCUGUCUCCAGAAAUA<br>GAGCAGCACUCGACCUCUU   |
| USP22  | GGAGAAAGAUACCUCGAA<br>CAAAGCAGCUCACUAUGAA<br>GGAAGAUCACCACGUAUGU<br>CCUUUAGUCUCAAGAGCGA  |
| USP24  | GGACGAGAAUUGAUAAAGA<br>AGGGAAACCUUACCUGUUA<br>CCACAGCUUUGUUGAAUGA<br>GUAGAAGCCUUGUUGUUCA |
| USP25  | GCAGAUGGAUGAAGUACAA<br>UGAAAGGUGUCACAACAUA<br>GAGCUGAGGUUUCUAUUUG<br>CAAUUAAGUUGGAAUAUGC |
| USP26  | CCACAAAGCUGGAGGUAAA<br>GAAGAUACCUCACUUUGUC<br>GCACAAGACUCCGUUGGA<br>CCACACAUUGGAUCAGAU   |
| USP27X | UCAUGUGCCCUAUAAGUUA                                                                      |

|       |                      |
|-------|----------------------|
|       | GAUAUGACGCCGUUUAUGG  |
|       | GAUGUGAGAUGCCGAGUCC  |
|       | UAGCAGUAGACCUGUAUUA  |
| USP28 | GAAGGUGGCUCAAGCGAAA  |
|       | UGACACACAUAUGACAUUA  |
|       | CAACAAGGAAGUAUUAGCA  |
|       | UCAGGUGCCUUAUCGCUUG  |
| USP29 | GAAAGAAGCUCUCAUUGAA  |
|       | GAAUAUAACUGUCAGAUGU  |
|       | GUACAAAGAUCAAGAGAGA  |
|       | GAAGAACCCAUCAAGUUUA  |
| USP30 | ACAGGAUGCUCACGAAUUA  |
|       | GCCAAGAAGUUACUGAUGA  |
|       | GAGCAGCAGUCAGAAUAA   |
|       | CCAGAGUCCUGUUCGAUUU  |
| USP31 | GAACCAAGCGACAGUCAUA  |
|       | GUAGACAGCUCUCCAGUCA  |
|       | CCUCAAAACCUGCACUUUAU |
|       | CAGCAUACAUCCUCUUCUA  |
| USP32 | GAACAACACCUGGUAUUUG  |
|       | GUAAAUGGUCGGUGGAUAA  |
|       | GCUUGGUGCCCAUGGUAUA  |
|       | CUGUCAAGUAGUAAAGAGA  |
| USP33 | GGAGAAGGAUAUCAAAUUU  |
|       | GACAGUGGCUUAAUAAAUU  |
|       | GAGAAGAUGUGCAAUAAGA  |
|       | GUAGUAACCUUGCAAGAUU  |
| USP34 | GAAAUUGACUCUCCUUAUU  |

|       |                                                                                          |
|-------|------------------------------------------------------------------------------------------|
|       | UAACAUGGCUGACUAAUG<br>GCAAUGAGGUAAUUCUAG<br>GGACCAAUUUACAUAUUG                           |
| USP35 | AGAGCGAGCUGGCGGGUUU<br>GCUCGGAGUAUCUGAAGUA<br>CAACAUCCUUUACCUACAG<br>GGGCUUUGAUGAAGACAAG |
| USP36 | GCACACCACUGAAGAGAUU<br>GAAAGCAGAUGUCCUGAGU<br>GGACUCGGCUGAUGAUGGA<br>CCGUUAUUGUCCCAGAAUA |
| USP37 | CAAAGAGCUACCGAGUUA<br>GCAUACACUUGCCCUGUUA<br>AAACAAAGCCGCCUAAUGU<br>GAGGAUCGAUUAAGACUGU  |
| USP38 | GGAAGUAGCUAGUAAAGCA<br>GGAGACAAGUAUUAUCUUU<br>GUCCAGAAGUUACUAUUU<br>GCAUAGUACUAAUGGUUUA  |
| USP39 | GAUCAUCGAUCCUCAUUG<br>CAAGUUGCCUCCAUAUCUA<br>UCACUGAGAAGGAAUAUAA<br>ACAUAAAGGCCAAUGAUUA  |
| USP40 | GAAACUAGCUGUUAUACAU<br>GAAGAGAAAUGGGUCACUA<br>GCAGAGAGUUGCCGAUUUC<br>GAACGAGCCUGCGCAAGUU |
| USP41 | GGAAGAAGACCCGUGGGAA                                                                      |



CCAGGGAGUUAUCAAGCAA  
GGAAUUCACAGACGAGAAA  
GCGAGAGUCUUGUGAUGCU

---

USP42 UGACAAAGCUUCUGAAUCU  
UUAGAGACCUUCAGGCUUA  
CAACCUAACCUUCAUAGUA  
GAAUGGGAUUGGUACGAUU

---

USP43 GGGCUUAUAUCCUGUUCUA  
GUGAAAGGCAGAAGCAUUA  
GAAGAGGACCUGAAUACCA  
GUGCUBAAUCCUCUUCUGUA

---

USP44 GAACAUGGUUUGAACAUC  
GUAGAAAGAUGGAACUUAU  
GAAUUGGAGUAUCAAGUUA  
GAAGAUUGGUGUUCAUGUU

---

USP45 CCAGGAAAUAUCGGAACA  
CUGUAAUAAAAGACGGUAA  
GAACAUAGUGGCUCGAUGA  
UGGCUUGAGUCUUCGUAAA

---

USP46 GAAACUCGAUGCUUGAACU  
CCAGAGCAGUUCCAAUCA  
GGGAGAAUGUGUUGGCAUA  
UGAACGAACCUGCGGAAAA

---

USP47 GGACUUGACUCUCACAGUA  
CCUGAAAGCUGAAGGAUUU  
GAGAGAAGCUUAGUGAAAU  
GCAACGAUUUCUCCAAUGA

---

USP48 CUACAUCGCCACGUGAAA

GCACUCUACUUAUGUCCAA  
GGCAGAGAGUCUAAGCUUU  
CGAAUUGCUUGGUUGGUAU

---

USP49

CCAAACAGGUCUAAAAGGU  
GGAUAGAUGCAAACAUGUA  
UAUUAACCAUGGAACCUUA  
ACAAGGAGCCGAGUUCAAA

---

USP50

UAUGAUACCCUCCAGUUA  
GAGAACGGAUAUUCAUUAC  
GGUUUGACAUUCAGGGUAC  
CAACACAUGCUGCGUGAAU

---

USP51

GAGCAGGGAUGACCACUA  
AAACAAAGCAGCACCAUUU  
GCUUUAAGUAGGUAAGAA  
GGUUGAUCUACCAGCGUUU

---

USP53

GAAGUCCCUUGAAUCUAA  
GAAAGGACCAGCUAAGUUA  
GCAAUGAGGUUGAAAGAAU  
GAAAAGAACUCAGGAAUUU

---

USP54

GAUAGAAGUUUGUCAGGUA  
GAAUUUACGUCGCAUCUCA  
GGGAAGAGUCCACUGAACA  
GGUCACUGAUAGAGCGCAA

---

USPL1

CAAGAAAGCUCGUAAGAGU  
GGACACAGCUGUAACUCAU  
UCAAUUGAGUGGUGUUA  
GUAAUUCAGUAUCGAGCAA

---

**Supplementary Table S2. The primer sequences for qRT-PCR assay**

| <b>Genes</b> | <b>Forward (5' - 3')</b> | <b>Reverse (5' - 3')</b> |
|--------------|--------------------------|--------------------------|
| <i>Smad4</i> | CTCATGTGATCTATGCCCCGTC   | AGGTGATACAACCTCGTTCGTAGT |
| <i>GAPDH</i> | GGAGCGAGATCCCTCCAAAAT    | GGCTGTTGTCATACTTCTCATGG  |
| <i>USP7</i>  | GATGAAAAGTCGTTTCAGTCGTCG | TTTGAATCCCACGCAACTCCA    |
| <i>USP10</i> | AAGCAAGCTATGGCTCCATCG    | CTCCGCCTCCACATTAGAAC     |
| <i>USP11</i> | CGTTTCCGGGACCAGAATCC     | CATCGCCGTCCGTTCTCTTC     |
| <i>USP21</i> | CAGGTCTGCCTGATGAACGG     | GCTAAGTTGGTCCGAGATGGG    |
| <i>USP26</i> | TTGACACTTACTTGCGGAGAGT   | ACACCTCGAACAATCTGCCTT    |
| <i>USP29</i> | GAAACTCGGGCCTTCATTCAA    | CTGTGCTCTGGTTCCAATGG     |
| <i>USP33</i> | AAAATCCCTTGGTACTTGTGAGG  | TCGAAGAGTGGTAAGGTTTACA   |
| <i>USPL1</i> | GAGTATTGCCCTGCTTGTAGAG   | CTGAGGCTTATGTGGAGTGTG    |

**Supplementary Table S3. The targeting sequences for shRNA**

| <b>shRNAs</b> | <b>Targeting Sequences (5'- 3')</b> |
|---------------|-------------------------------------|
| shUSP7        | TGTATCTATTGACTGCCCTTT               |
| shUSP10#1     | GCCTCTCTTTAGTGGCTCTTT               |
| shUSP10#2     | CCTATGTGGAAACTAAGTATT               |
| shUSP10#3     | GCTGTGGATAAACTACCTGAT               |
| shUSP11       | CCCTCCCTTCTAGTCTTTATT               |
| shUSP21       | GACCCTCTGCAATATCACTTT               |
| shUSP26       | CTACTTTCAATCCCATCGTTT               |
| shUSP29       | CCACTTTAGAGATAGGGCAAT               |
| shUSP33       | CCTGGCCCTATTTCAAATAAT               |
| shUSPL1       | CCTACCTCATTTTCGATGAATA              |
| shSmad4       | GCAGACAGAAACTGGATTAAA               |
